# Supplementary material for: Efficacy of Steroid Therapy for Fukuyama Congenital Muscular Dystrophy
Source: Research Square preprint supplement (doi:10.21203/rs.3.rs-561209/v1), 2021-06-28
Supplement: Supplementary file 1 [file 36a511f20833ba42e150c577.docx]

**A study on the effectiveness of steroid therapy for patients with Fukuyama congenital muscular dystrophy**

**Study protocol**

**Principal investigator: Keiko Ishigaki, Lecturer, Tokyo Women’s Medical University,**

**Department of Pediatrics**

|  |  |
| --- | --- |

Version 4.0 date created: December 28, 2015

**1. Project summary**

Fukuyama congenital muscular dystrophy (FCMD) is muscular dystrophy with cerebral dysgenesis, and ocular abnormality.1 It is thought that the underlying cause is a mutation of the fukutin gene leading to irregular glycosylation of alpha-dystroglycan destabilizing the muscle basal lamina and plasma membrane; however, the detailed pathology has not been elucidated.

In the clinical course, it has been found that the maximum level of motor function achieved by approximately 6 years of age is unassisted sitting, and crawling, and that motor function declines from around 7 or 8 years of age. While radical treatment is still at the research stage, prognosis has been improved by the popularization of treatment for cardiac insufficiency, and non-invasive respiratory therapy for respiratory failure.

With regard to steroid therapy for FCMD, there are only reports that predonine therapy administered at exacerbation of temporary muscle weakness following viral infection was effective for the improvement of clinical symptoms.5 – 7 However, there are case reports indicating that steroid therapy improved motor functioning in FCMD patients, whose motor function has recently started to decline, as per in DMD.8, 9

This study aimed to evaluate the efficacy of steroid therapy for restoring motor functions in FCMD patients.

The dose regimen started with oral administration of prednisolone at 0.5 mg/kg every other day and was increased to 1.0 mg/kg if the response was insufficient. The motor functions of the patients were evaluated and compared using the Gross Motor Function Measure (GMFM). Statistical analysis was performed using the Wilcoxon signed-rank test (significance level, *P* ≤ 0.05)

If the effectiveness of steroid therapy for FCMD patients were to be established, then we believe that it would improve the prognosis, and quality of life of patients further.

**2. General information**

1) Protocol title: A study on the effectiveness of steroid therapy for patients with Fukuyama

congenital muscular dystrophy

2) Registration Number: UMIN000020715, Registration Date: 1 February 2016.

3) Name and address of the sponsor/funder: The present study will be performed with the

research funds of the principal investigator’s affiliated medical department.

4) Principal investigator: Keiko Ishigaki, Lecturer

5) Research site: Tokyo Women’s Medical University, Department of Pediatrics

6) Research site address: 8-1 Kawada-cho, Shinjuku, Tokyo 162-8666, Japan

7) Research site telephone number: +81-3-3353-8111

**3. Rationale & background information**

In patients with DMD, the stability of the muscular basal membrane and cellular membrane is disrupted because of the absence of dystrophin, which results in progressive muscle fiber damage. The efficacy of steroid therapy in managing this disease has been demonstrated, as it extends the walking duration, maintains the cardiopulmonary functions, and prevents scoliosis. The possible mechanisms to explain the efficacy of steroid therapy include decrease in cytotoxic T cells, Ca intracellular influx, and laminin protein concentrations; however, these mechanisms remain unclear.

**4. Study objectives**

To examine whether steroid therapy is effective for FCMD patients.

**5. Study Outcomes**

1) Primary outcome

Change from before to after treatment in the motor function evaluation according to the Gross

Motor Function Measure (GMFM)

2) Secondary outcomes

Changes from before to after treatment in the following items

1. Evaluation of muscle mass by muscle magnetic resonance imaging (MRI), and computed

tomography (CT)

1. Evaluation of muscle mass by biological impedance analysis (BIA)

**6. Study design**

1) Study type: Single center, single arm

2) Control: Accumulated data of the natural course of patients diagnosed with FCMD by genetic

testing who were undergoing follow-up at our department from 1998 to 2015.

As it is a rare disease, it is ethically difficult to create a non-oral therapy group for the control

target, and therefore, the control target was defined as the accumulated data of the natural course.

3) Planned number of study subjects

Target number of subjects: 14 patients

Patient extraction method: Among patients aged 3 to 10 years exhibiting clinical symptoms, as

well as reduced motor function as evaluated by the GMFM in routine clinical practice, those who

have provided consent for steroid therapy.

4) Grounds for setting the number of subjects

With a significance level of 5 % and 80 % power set on the basis of existing reports of

the intergroup difference between the steroid therapy group and the group without steroid

therapy in the natural history of patients to date, and dispersion of the two groups, we

calculated the sample size needed to determine the mean difference between two groups.

5) Handling of termination, withdrawals, and missing data

For patients who terminate or drop out, the data up to the point of termination or

dropping our will be used. Missing data cannot be supplemented.

6) Study participation

After subjects sign the informed consent form, the procedures to verify eligibility for the present

study are to commence. Verify that all of the inclusion criteria are satisfied, and that none of the

exclusion criteria apply.

7) Inclusion criteria

Subjects who satisfy all of the following criteria will be included.

1. Patients being treated at Tokyo Women’s Medical University Department of Pediatrics on

an outpatient or inpatient basis.

1. Patients with genetically determined definite diagnosis of FCMD.
2. Patients aged 3 to 10 years, who are diagnosed with FCMD, who present reduced total

scores on the GMFM, clinical symptoms, and who start to exhibit reduced motor

functioning. (Grounds for selecting patients aged 3 to 10 years: According to the

accumulated data to date from previous research, the GMFM and motor function in clinical

symptoms is found to peak at around 4 – 8 years, and thus we decided to select patients aged

3 to 10 years.)

8) Exclusion criteria

Patients who fall under the following criteria will be excluded from this study.

1. Patients with a history of hypersensitivity to constituents of the steroid preparation to be

used.

1. Patients with infection, and systemic mycosis for which there are no effective antibiotics
2. Patients with peptic ulcers
3. Patients with psychosis
4. Patients with tuberculosis-related illness
5. Patients with herpes simplex-related keratitis
6. Patients with posterior capsule cataract
7. Patients with hypertension
8. Patients with electrolyte abnormality
9. Patients with thrombosis

⑪ Patients with a recent surgical wound of the viscera

　⑫ Patients who have developed acute myocardial infarction

⑬ Other, patients deemed ineligible as subjects by the principal investigator

9) Termination criteria

When the principal investigator or subinvestigator discover that a subject falls under the

following termination criteria, they will explain so to the subject, and terminate evaluations of the

subject concerned. Furthermore, in the event of termination, safety will be confirmed as much as

possible, after which, sincere efforts will be made to ensure that the subject will not be

disadvantaged. For patients for whom the study was terminated due to adverse events,

appropriate measures will be implemented as needed, and follow-up will be performed whenever

possible until recovery of the adverse event.

1. Refusal to continue participation in the study (and refusal of all subsequent observations)
2. Incompatibility in the inclusion/ exclusion criteria
3. Death (the cause is to be recorded)
4. Patients who exhibit a decrease in the total score of the GMFM upon evaluating motor function at 3 months after starting predonine, and who show no improvement in clinical symptoms.
5. When subject follow-up is not possible, and tests and observations can no longer be performed.
6. When a subject consents, but study participation is no longer medically legitimate, and therefore, the principal investigator or subinvestigator concludes participation

**7. Methodology**

1) Study procedure

After explaining the risks and advantages of this trial to patients, help subjects check the content of the informed consent form, answer all questions from subjects, and once the subject has signed the consent form, commence the procedures to check eligibility.


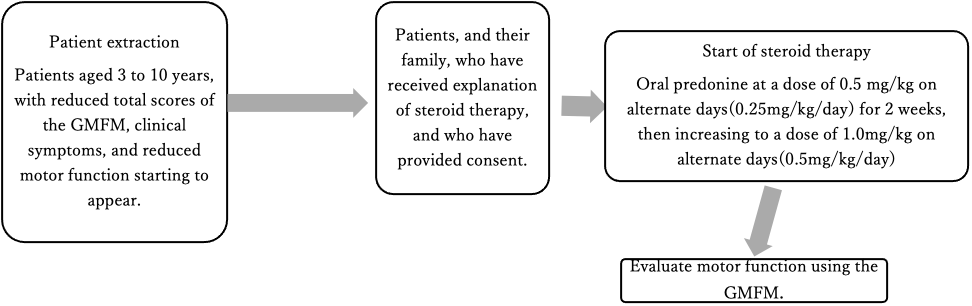

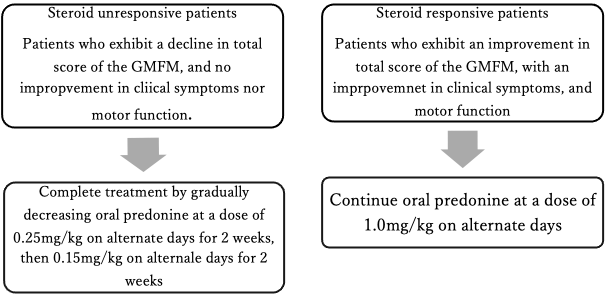

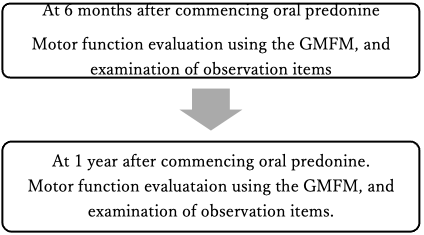


**３ months**

**3 months**

**6 months**

**1 year**

When the exclusion criteria apply, gradually terminate oral therapy.

Gradual reduction method: terminate predonine by decreasing to 0.25mg/kg on alternate days for 2 weeks, then 0.15mg/kg on alternate days for 2 weeks.

a) Eligibility verification

Upon checking that subjects satisfy the selection criteria, and do not fall under exclusion criteria, perform subject enrollment.

b) Outline of the investigational drug

i) Investigational drug name:

1 Predonine tablets 5mg, prednisolone, PSL

2 Prednisolone tablets 1mg (Asahi Kasei), prednisolone, PSL

3 Prednisolone powder ‘Takeda’ 1%、prednisolone, PSL

ii) Manufacturer:

1 Shionogi Inc.

　　　2 Asahi Kasei Pharma Corporation

　　　3 Takeda Pharmaceutical Company Limited

iii) Therapeutic classification: (1-3) Synthetic corticosteroid

iv) Mechanism of action:

(1-3) Prednisolone is a synthetic glucocorticoid with anti-inflammatory action,

anti-allergic action, and immunosuppressive action, as well as various metabolic actions.

As for itts mechanism of action in DMD, various theories have been proposed,

such as: it increases dystrophin protein expression, reduces cytotoxic T cells, reduces

intracellular inflow and concentration of Ca, increases laminin protein expression,

promotes muscle repair and inhibits the progression of apoptosis in muscles; however,

the mechanism of action has not been elucidated.

v) Indications: (1-3) DMD, rheumatic illness, collagen disease, malignant tumor, and

endocrine disease, etc.

vi) Administration method, and dose:

vii) Administration method, and dose for DMD: Various methods of administration have

been reported. The administration method with the highest evidence of effectiveness is

prednisolone at a dose of 0.75 mg/ kg given daily. When providing treatment at a low

dose due to adverse reactions, the minimum dose with evidence of effectiveness is 0.3 mg/kg given daily. Although the evidence level regarding effectiveness is low, the

method of 10-day administration followed by a 10-day washout period, and weekend

high-dose therapy are also used.4

iix) Contraindications:

１ Patients with a history of hypersensitivity to the constituents of this preparation

２ Patients with infection, and systemic mycosis, for which there are no effective

Antibiotic

３ Patients with peptic ulcers

４ Patients with psychosis

５ Patients with tuberculosis-related illness

６ Patients with herpes simplex-related keratitis

７ Patients with posterior capsule cataract

８ Patients with hypertension

９ Patients with electrolyte abnormality

10 Patients with thrombosis

11 Patients with a recent surgical wound of the viscera

12 Patients who have developed myocardial infarction

　　 With regard to 1 – 12, administer with caution when needed in particular.

ix) Primary clinical use outcomes: (1-3)

There is a report of clinical use for 2 patients with mild FCMD who were able to

walk. In both cases, an improvement in motor function was observed after the start of

oral prednisolone therapy.

Case 1 was a FCMD patient aged 9 years and 6 months who was able to walk, but

who developed difficulty standing up, and with the consent of the patient concerned and their family, oral prednisolone therapy was started at a dose of 0.75 mg/ kg given on

alternate days. At 6 months after the start of treatment, an improvement was observed

in the time taken to sit up from the supine position, the time taken to move 10 meters in a wheelchair, and in the maximum expiratory flow rate. Apart from mild weight gain, and hirsutism, there were no adverse reactions observed.

Case 2 was a FCMD patient aged 6 years and 4 months who was able to walk, and

who developed remarkable fatigue, and thus with the consent of both parents,

prednisolone was commenced at a dose of 0.5 mg/ kg given on alternate days. After

commencing oral

therapy, an improvement in motor function such as increased walking speed, and

movement was observed, and the fatigue disappeared. At 3 months after commencing

oral therapy, improvements were observed, such as the subject became capable of

alternate stair ascent with a hand rail, open a PET bottle lid, speak louder. There were

no adverse reactions observed.

x) Adverse reactions: (1-3) obesity, behavioral disorder, increased risk of bone fracture,

osteoporosis, growth disorder, reduced immune function, steroid acne, moon face,

hypertension, decreased glucose tolerance, gastrointestinal ulcer, and cataracts, etc.

xi) Interaction: Caution should be exercised with the concurrent use of barbiturate

derivatives, salicylate derivatives, anticoagulants, oral medications for diabetes mellitus,

diuretics, active vitamin D3 preparations, cyclosporin, erythromycin, and nondepolarizing

muscle relaxant.

xii) Precautions for use:

① Serious adverse reactions can appear such as induced infection, secondary

adrenocortical insufficiency, gastrointestinal ulcer, diabetes mellitus, psychic

disturbance, etc.

② After continuous use, if administration is stopped suddenly, withdrawal symptoms

Such as shock can appear.

③ Patients receiving long-term therapy or large-dose therapy, and patients who

discontinued therapy less than 6 months ago cannot receive live vaccines.

c) Administration method of the investigational drug

Administration method and dose: commence prednisolone at a dose of 0.5 mg/kg given

orally on alternate days(0.25mg/kg/day), and then after 2 weeks, increase the dose to

1.0 mg/kg given orally on alternate days (0.5mg/kg/day)

d) Stipulations regarding concurrent drug (therapies): Not applicable

e) Stipulations regarding dose reductions and withdrawal

In the following events, discontinue the drug after gradually decreasing to a dose of

0.25 mg/kg give orally on alternate days for 2 weeks, and then to 0.15 mg/ kg given

orally on alternate days.

When the exclusion criteria apply

When in the evaluation after 3 months of oral steroid therapy it is judged that the

patient is unresponsive to steroids

When adverse events appear as a result of steroids

f) Administration period

Up to 1 year (3 months in steroid unresponsive patients)

g) Observation and test items

Observations will be performed according to the following schedule. When abnormal

findings are observed, treat appropriately.

① Basic patient information: age, gender, gene mutation, body height, and weight.

② Blood pressure (systolic, and diastolic)

③ Blood biochemistry: White blood cell count, differential white blood cell count,

platelet count, hemoglobin, electrolytes (Na,K,Cl), AST, ALT, CK, aldolase, LDH, γGTP, ALP, BUN, creatinine, amylase, lipase, blood glucose, total cholesterol BNP (before commencement, at 6 months, and at 1 year) HBs antibodies, HBe antigens,

IgG, IgM, IgA (before commencement only)

④ Urine analysis: specific gravity, pH, protein, occult blood, glucose

⑤ Motor function evaluation: GMFM

⑥ Muscle mass evaluation: muscle MRI, muscle CT, BIA

⑦ Screening for eye disease: The presence or absence of cataracts, and glaucoma

⑧ Verification of drug-taking status

⑨ Verification of adverse event

|  | | Pretreatment | Observation period (12 months) | | | | | |
| --- | --- | --- | --- | --- | --- | --- | --- | --- |
| Period | | 0 | ２weeks | 1 month | 2 months | 3 months | 6 months | 12 months |
| Consent | | ○ |  |  |  |  |  |  |
| Patient background | | ○ | ○ | ○ | ○ | ○ | ○ | ○ |
| Blood pressure | | ○ | ○ | ○ |  | ○ | ○ | ○ |
| Blood biochemistry | | ○ |  | ○ |  | ○ | ○ | ○ |
| Urine analysis | | ○ |  | ○ |  | ○ | ○ | ○ |
| Motor function evaluation | | ○ |  | ○ |  | ○ | ○ | ○ |
| Muscle mass evaluation | BIA | ○ |  | ○ | ○ | ○ | ○ | ○ |
| CT | ○ |  |  |  |  |  | ○ |
| MRI | ○ |  |  |  |  |  | ○ |
| Screening for eye disease | | ○ |  |  |  |  |  | ○ |
| Verification of drug-taking status | | ←　○　→ | | | | | | |
| Adverse events | | ←　○　→ | | | | | | |

Hospital visit deviation is defined as ±1 month

2) Study completion

At the point in time when all observations have been completed, and it has been confirmed

that there are no abnormal findings that require follow-up, the study will be complete for thesubject concerned. After study completion, the principal investigator or subinvestigator will

provide medical treatment that is considered to be the most suitable upon consulting the

subject.

**8. Safety consideration**

1) Definitions

Adverse events refer to all unfavorable and unintentional injury and illness, as well as the

related signs (including abnormal laboratory test values) that occur in the study subjects,

regardless of the presence or absence of a causal relationship with the study implementation.

Examples of adverse events are listed below: however, the list is not exhaustive.

●Abnormal test values

●Symptoms and signs of clinical significance

●Changes in physical findings

●Hypersensitivity

2) Subject treatment at the onset of adverse events

When an adverse event is observed for the subject concerned, administer appropriate

treatment without delay, and note the event in the medical record. Furthermore, when

administration of the investigational drug is terminated, and treatment for an adverse event

is needed, the subject is to be informed of such.

3) Anticipated adverse events

①　Induced infection, exacerbation of infection

②　Secondary adrenocortical insufficiency, diabetes mellitus

③　Gastrointestinal ulcer, gastrointestinal perforation, hemorrhage of digestive tract,

　　diarrhea, nausea, vomiting, stomachache, heartburn, abdominal bloating, thirst, loss 　　of appetite, increased appetite, intestinal cyst, pneumatosis

④　Pancreatitis

⑤　Mental aberration, depressive state, convulsions, euphoria, sleeplessness, headache,

　　dizziness, and irritability

⑥　Osteoporosis, aseptic necrosis of bone head (such as of the femur and humerus),

　　myopathy

⑦　Glaucoma, posterior capsule cataract, central serous chorioretinopathy, multifocal

　　posterior retinal pigment epitheliopathy, retinal disorder, bulging eyes,

⑧　Thrombosis

⑨　Myocardial infarction, cerebral infarction, arterial aneurysm,

⑩　Extradural lipoma

⑪　Tendon rupture

⑫　Mediastinal emphysema

⑬　Muscular pain, joint pain

⑭　Moon face, buffalo hump, nitrogen imbalance, fatty liver,

⑮　Edema, elevated blood pressure, hypokalemic alkalosis

⑯　Leukocytosis

⑰　Acne, Hairiness, hair loss, chromatosis, suggillation, purpura, striae, pruritus,

　　abnormal　sweating, facial erythema, panniculitis

⑱　Rash,

⑲　Fever, sense of fatigue, steroid nephropathy, weight gain, increased/ decreased

　　sperm count and related functioning, urinary calculus, wound healing disturbance,

　　thinning/ fragilization of the skin and connective tissue

4)　Serious adverse events

a) Definition

Serious adverse events refer to adverse events that correspond to any of the following.

　　　①　Events that lead to death

　　　②　Events that are life-threatening

③　Events that require hospitalization, or prolongation of hospital stays for treatment

　　　④　Events that cause permanent or marked impairment and dysfunction

　　　⑤　Events that cause congenital anomalies in offspring

　The principal investigator will report all serious adverse events during the study period

　without delay to the board chairperson and hospital director via the study support division.

b) Unexpected serious adverse events

Unexpected serious adverse events refer to those among serious adverse events that are

not listed in the study plan or informed consent form, or if listed, those for which the

peoperties and severity do not correspond to that of the described content. When an

unexpected serious adverse event occurs, and a direct causal relationship with this study

cannot be ruled out, the head of the research institution (board chairperson) will report to the Minister of Health, Labour and welfare without delay, and announce the results such

as of the situation, and associated measures.

5) Collection and evaluation

Adverse events will be checked by direct observation (including tests), as well as by

voluntary reporting by the patient and questioning the patient at the time of hospital

visitations. Complications that existed prior to study commencement will be considered

adverse events only in the event of their exacerbation after study commencement. Abnormal

laboratory test values, and other test results will be considered adverse events only when theycause clinical signs and symptoms, when treatment is required, and when the principal

investigator or subinvestigator judges them to be of clinical importance. Events that are

judged to be adverse events are to be properly noted in medical records, and case report

forms, and to be evaluated.

**9. Follow up**

At the point in time when all observations have been completed, and it has been confirmed

that there are no abnormal findings that require follow-up, the study will be complete for thesubject concerned. After study completion, the principal investigator or subinvestigator will

provide medical treatment that is considered to be the most suitable upon consulting the

subject.

**10. Data management and statistical analysis**

1) Monitoring and auditing

a) Monitoring

In individual in charge of monitoring will peruse various records of the study (such as case report

forms, original data, and other related materials), as needed, and is responsible for verifying the

enrolment status, state of compliance with the protocol, data completeness, accuracy, consistency,

and state of compliance with ethical guidelines. The individual in charge of monitoring will check

the details of case report forms and ensure study integrity.

The individual in charge of monitoring will report to the principal investigator any deviations from

protocol, various procedural manuals, and applicable regulatory requirements. They will also

check that appropriate measures to prevent recurrence of deviations that have occurred have been

adopted and recorded. The principal investigator will consent to cooperate with the individual in

charge of monitoring so that all problems detected through the process of the monitoring are

accurately processed and recorded.

b) Auditing

The present study may be audited. To evaluate the state of study implementation, and state of

compliance with protocol and applicable regulatory requirements, an inspection of the study

implementation site, and review of records pertaining to the study will be performed. In the event

that an audit is performed, the auditor must report the results of said audit to the principal

investigator, and the board chairperson.

2) Statistical analyses

　a) Grounds for setting the number of subjects

With a significance level of 5 % and 80 % power set on the basis of existing reports of

the intergroup difference between the steroid therapy group and the group without steroid

therapy in the natural history of patients to date, and dispersion of the two groups, we

calculated the sample size needed to determine the mean difference between two groups.

b) Handling of termination, withdrawals, and missing data

For patients who terminate or drop out, the data up to the point of termination or

dropping our will be used. Missing data cannot be supplemented.

c) Analysis methods

A t-test and Wilcoxon rank sum test will be used to test the mean difference between

2 independent groups

**11. Quality assurance**

1) Data handling and record keeping

a) Data collection

The principal investigator or subinvestigator will input into a PC all data collected in case report forms of each subject. Furthermore, individuals who are able to record data on case report forms must be individuals registered on the study member or study collaborator

lists created in advance. Moreover, details that are independent from medical decisions

such as transferring numerical values such as of laboratory test values, subject background, and prescription status of concurrent drugs can also be input by study collaborators.

b) Data management

The principal investigator is responsible for the quality control and quality assurance of

data at the participating medical institution concerned. A procedural manual regarding the

implementation of data management of the study concerned will be created, and data will be managed according to said procedural manual. Furthermore, during study

implementation, data will be kept by the ‘medical office of the department of pediatrics’

c) Record keeping

Documents pertaining to trial implementation (such as copies of application forms,

notification from the head of the study institution, copies of each type of application and report form, subject identification code list, signed consent forms, record involving subject consent, copies of case report forms, etc., and other documents and records required to

ensure data reliability) will be kept by the principal investigator in an appropriate manner

until the day 5 years after the final report day, or 3 years after publication of the result

whichever is latest, after which such documentation shall be destroyed.

**12. Expected outcomes of the study**

It is possible that the trial outcomes can contribute to the progression of medical care in

future.

**13. Dissemination of results and publication policy**

Study personnel will make the study results public though announcements such as at

related conferences or Journal.

**14.** **Duration of the project**

Up to 1 year (3 months in steroid unresponsive patients)

**15. Problems anticipated**

At the time of undergoing MRI, sedation will be required because the subjects cannot

keep quiet during the examination.

**16.** **Project management**

The present study will be implemented by the following organization.

Study members

Satoru Nagata　　　Tokyo Women’s Medical University, Department of Pediatrics

◎Keiko Ishigaki　　　Tokyo Women’s Medical University, Department of Pediatrics

Terumi Murakami 　Tokyo Women’s Medical University, Department of Pediatrics

Takatoshi Sato 　　 Tokyo Women’s Medical University, department of Pediatrics

Kumiko Ishiguro 　 Tokyo Women’s Medical University, Department of Pediatrics

Minobu Shichiji　　 Tokyo Women’s Medical University, Department of Pediatrics

（◎ Principal investigator）

Data manager

　　　　Kaoru Eto　　 Tokyo Women’s Medical University, Department of Pediatrics

Individual in charge of monitoring

　　　　Emiko Tachikawa Tokyo Women’s Medical University, Department of Pediatrics

Auditing

　　　　Takahiro Nakayama Yokohama Rosai Hospital, Department of Neurology

**17. Ethics**

1) Considerations for the human rights of subjects, and methods for the protection of the

personal information. All individuals involved in this study will conduct the study in

accordance with the ‘Declaration of Helsinki’, and the ‘ethical principles for medical

research involving human subjects (ethical principles hereafter)’.

When handling test samples and data, a number that is unrelated to the person

information of subjects will be used for reference and management, and due considerations will be made to protect the confidentiality of subjects. When announcing the study result

information with which subjects can be identified will not be included. Furthermore, apart from the purpose of the study, subject samples and data obtained in the study will not be used.

Ethical principles for medical research involving human subjects

<http://www.lifescience.mext.go.jp/files/pdf/n1443_01.pdf>

2) Consent acquisition method

a) Procedure for acquiring consent

Study personnel will provide subjects (including legal representatives) the informed consent form

that has been approved by the ethical review board, thoroughly explain the study in writing and

verbally, and obtain written consent from subjects at their own free will. When study personnel

have obtained information that can affect subject consent, and when protocol modifications are

made that could affect subject consent, they will provide such information to the subjects without

delay and reconfirm whether or not the subject wishes to participate in the study. In addition,

revisions will be made such as to informed consent forms with prior approval by the ethical

review board, and consent will be obtained again from subjects.

The following details are to be included in the informed consent form.

① Participation in the study is voluntary, subjects will not be disadvantaged if they do not

consent, and subjects can withdraw consent

② The study significance (background), purpose, subjects, methods, implementation period, and

planned number of subjects

③ Anticipated advantages, and disadvantages that might occur by participation in the study

④ Handling, safekeeping period, and destruction method such as of test specimens including

personal information, perusal such as of research methods

⑤ Announcement of study results, and handling when a patent occurs

⑥ Costs borne by subjects involving the study, study funding, and conflicts of interest

⑦ Study organization, and consultation desk for inquiries and grievances involving the study

(contact details)

⑧ Response in the event of health damage to subjects, and the presence or absence of

compensation

b) Consent from the legal representative

Research subjects who require consent from their legal representative, and the associated reason.

Because the study subjects are minors (individuals less than 20 years of age, who have not been

married). However, when subjects are minors who have completed junior high school and who

are aged 16 years or older, and are deemed to have full judgement ability with regard to study

participation, or, when subjects are aged 7 to 17 years of age, and are deemed capable of

expressing their own intentions with regard to study participation, the principal investigator or

subinvestigator will strive to obtain informed consent from the study subject in addition to

consent from the legal representative. Furthermore, the legal representative is defined as the

following individual taking into consideration the family structure of the subject, and on the basis

of selecting an individual thought to be able to represent the intent and interests of the subject.

Legal representative: person in parental authority, and guardian of a minor.

**18. References**

1. Fukuyama Y, Osawa M, Suzuki H. Congenital progressive muscular dystrophy of the Fukuyama type - clinical, genetic and pathological considerations. *Brain & development.* 1981;3(1):1-29.

2. Bushby K, Finkel R, Birnkrant DJ, et al. Diagnosis and management of Duchenne muscular dystrophy, part 1: diagnosis, and pharmacological and psychosocial management. *Lancet neurology.* 2010;9(1):77-93.

3. Manzur AY, Kuntzer T, Pike M, Swan A. Glucocorticoid corticosteroids for Duchenne muscular dystrophy. *Cochrane Database of Systematic Reviews.* 2008(1):CD003725.

4. Japanese Society of Neurology, National Center of Neurology and Psychiatry. Clinical practice guideline for Duchenne muscular dystrophy. *Nankodo.* 2014.

5. Godfrey C, Escolar D, Brockington M, et al. Fukutin gene mutations in steroid-responsive limb girdle muscular dystrophy. *Annals of neurology.* 2006;60(5):603-610.

6. Terumi Murakami, Keiko Ishigaki, Takatoshi Sato, Sachiko Kajino, Takashi Saito, Makiko Osawa. Treatment for exacerbation of muscle weakness after febrile illness in Fukuyama congenital muscular dystrophy. *Journal of Tokyo Women's Medical College..* 2013;83:E36-41.

7. Murakami T, Ishigaki K, Shirakawa S, Ikenaka H, Sakauchi M, Osawa M. Severe muscle damage following viral infection in patients with Fukuyama congenital muscular dystrophy. *Brain & development.* 2012;34(4):293-297.

8. Akie Miyamoto, Ikue Fukuda, Hajime Tanaka, Ryuji Oku, Kazuhiko Cho. A trial of steriod therapy for (mild type) Fukuyama congenital muscular dystrophy. *Journal of the Japanese Society of Child Neurology, No to Hattatsu.* 2010;42(Suppl.):S330-S330.

9. Miyuki Toyono, Yukio Sawaishi, Tamami Yano, Hiroki Kubota, Keiko Ishigaki. The effects of steroid therapy for ambulatory patients withFukuyama congenital muscular dystrophy. *Journal of the Japanese Society of Child Neurology, No to Hattatsu.* 2015;47(suppl):5245-5245.
