# Supplementary material for: Efficacy of Steroid Therapy for Fukuyama Congenital Muscular Dystrophy
Source: Research Square preprint supplement (doi:10.21203/rs.3.rs-561209/v1), 2021-06-28
Supplement: Supplementary file 2 [file 943d7e9f10e99bcfc6cda591.docx]

**1. Budget**

The medications used and tests performed in this study will be done so within the health

insurance treatment of the subject, and therefore, we will incur no financial burden.

**2. Other support for the project**

The present study will be performed with the research funds of the principal investigator’s affiliated medical department. Furthermore, the principal investigator of the present study, and study personnel will report necessary matters to the conflict-of-interest management committee as stipulated in the ‘conflict of interest management regulations’, to be examined and obtain approval

**3.** **Curriculum Vitae of investigators**

A PDF will be attached separately.

**4. Other research activities of the investigators**

The list all current research projects of Principal investigator

| Research projects | Source of  funding of those projects | Duration of those projects | Percentage of time spent |
| --- | --- | --- | --- |
| Basic research aimed at developing a prostanoid synthetase inhibitor for patients with Fukuyama congenital muscular dystrophy | Grant-in-Aid for Scientific Research | 2016.4-2019.3 | 35 |
| Clinical research and system development aimed at creating evidence of muscular dystrophy | Research Grants for Neurological and Psychiatric Disorders from the National Center of Neurology, and Psychiatry | 2014.4-2017.3 | 15 |
| Research on lysosomal storage diseases (including Fabry disease) | Health and Labour Sciences Research Grants for Research on rare and intractable diseases from the Ministry of Health, Labour and Welfare | 2014.4-2017.3 | ５ |
| Research on clinical infrastructure development to promote myotonic dystrophy clinical trials | Practical Research Project for Rare / Intractable Diseases from Japan Agency for Medical Research and development, AMED | 2014.4-2017.3 | 5 |
| Study on the natural history of Fukuyama congenital muscular dystrophy and searching for biomarkers | Practical Research Project for Rare / Intractable Diseases from Japan Agency for Medical Research and development, AMED | 2014.4-2017.3 | 20 |
